# Supplementary material
Source: publisher figshare collection journal article supplement (https://gsapubs.figshare.com/ndownloader/files/23293580)
Supplement: Supplementary file 1 [file 23293580]

## Sheet: Weibull-thickness
Estimating the volume of tephra deposits: a new simple strategy
Bonadonna, C. & Costa, A. (2011) Estimating the volume of tephra deposits: a new simple strategy, Geology
(please refer to the README file for detailed instructions)
Sqrt(A) (km)	T-Obs (cm)	T-Calc	Residual		theta =	2.26429	cm
0.240761	243.902	305.55	0.0638851		lambda =	5.66893	km
0.425227	162.602	110.418	0.102995		n =	0.338739
0.71539	81.3008	42.946	0.222562
1.19532	40.6504	16.6589	0.348325		SSRR =	2.70389	<-- minimize this (Sum of Squared Relative Residuals)
1.14099	39.3701	18.1641	0.290124				by varying the cells containing theta, lambda and n using the Solver function
1.73573	15.748	8.2795	0.224915
2.58004	3.14961	3.89253	0.0556391		volume/mass calculation
4.81236	0.787402	1.15416	0.216955		volume (km3)	volume (m3)	mass (kg)
6.80901	0.393701	0.576257	0.215012		0.00429634	4.29634e+06	5.37043e+09
10.2476	0.23622	0.249485	0.00315341		R2 =	0.953421
16.2313	0.15748	0.0945734	0.159567
21.4114	0.0787402	0.0518715	0.116439		deposit density (kg/m3)
28.7229	0.0393701	0.0270211	0.098385		1250
45.4616	0.015748	0.00941421	0.161763
60.9407	0.00787402	0.00468409	0.164123
76.5257	0.00393701	0.00268206	0.101605
108.811	0.000787402	0.00110082	0.158438
				Data from Bonadonna and Houghton (2005):				Ruapehu 1996 eruption
				Bonadonna, C., and B.F. Houghton, Total grainsize distribution and volume of tephra-fall deposits, Bulletin of Volcanology, 67:441-456, 2005

## Sheet: Weibull-mass-area
Estimating the volume of tephra deposits: a new simple strategy
Bonadonna, C. & Costa, A. (2011) Estimating the volume of tephra deposits: a new simple strategy, Geology
(please refer to the README file for detailed instructions)
Sqrt(A) (km)	mass/area-Obs (kg/m2)	mass/area-Calc	Residual		theta =	25.2652	kg/m2
0.240761	3000	3760.31	0.0642296		lambda =	6.05007	km
0.425227	2000	1367.39	0.10005		n =	0.346901
0.71539	1000	534.846	0.216369
1.19532	500	208.603	0.339648		SSRR =	2.67883	<-- minimize this (Sum of Squared Relative Residuals)
1.14099	500	227.341	0.297372				by varying the cells containing theta, lambda and n using the Solver function
1.73573	200	104.074	0.230046
2.58004	40	49.1198	0.0519816		mass/volume calculation
4.81236	10	14.6453	0.215792		mass (kg)	volume (m3)	volume (km3)
6.80901	5	7.33181	0.217493		5.33173e+09	4.26539e+06	0.00426539
10.2476	3	3.18261	0.00370521		R2 =	0.953955
16.2313	2	1.20898	0.156428
21.4114	1	0.663572	0.113184		deposit density (kg/m3)
28.7229	0.5	0.34574	0.0951851		1250
45.4616	0.2	0.120327	0.158695
60.9407	0.1	0.0597643	0.161891
76.5257	0.05	0.0341504	0.100484
108.811	0.01	0.0139532	0.156275
				Data from Bonadonna and Houghton (2005):				Ruapehu 1996 eruption
				Bonadonna, C., and B.F. Houghton, Total grainsize distribution and volume of tephra-fall deposits, Bulletin of Volcanology, 67:441-456, 2005
